# Supplementary material for: Synthesis of Hybrid Epoxy Methacrylate Resin Based on Diglycidyl Ethers and Coatings Preparation via Cationic and Free-Radical Photopolymerization
Source: MDPI journal article supplement (doi:10.3390/ijms232415592), 2022-12-09
Supplement: s1 [file s1]

# Supplementary data

## Synthesis of Hybrid Epoxy Methacrylate Resin Based on Diglycidyl Ethers and Coatings Preparation *via* Cationic and Free-Radical Photopolymerization

Paulina Bednarczyk<sup>a\*</sup>, Izabela Irska<sup>b</sup>, Konrad Gziut<sup>a</sup>, Karolina Mozelewska<sup>a</sup>, Paula Ossowicz-Rupniewska<sup>a</sup>

<sup>a</sup> West Pomeranian University of Technology in Szczecin, Faculty of Chemical Technology and Engineering, Department of Chemical Organic Technology and Polymeric Materials, Piastów Ave. 42, 71-065 Szczecin, Poland

<sup>b</sup> West Pomeranian University of Technology in Szczecin, Faculty of Mechanical Engineering and Mechatronics, Department of Materials Technology, Piastów 19 Avenue, 70-310 Szczecin, Poland

\*Corresponding author: Paulina Bednarczyk e-mail: bednarczyk.pb@gmail.com, paulina.bednarczyk@zut.edu.pl

---

Number of pages: 15

Number of Figures: 14

### Table of Contents

|                                                                       |        |
|-----------------------------------------------------------------------|--------|
| 1. The NMR spectra of substrates and epoxy methacrylated pre-polymers | S2-S15 |
|-----------------------------------------------------------------------|--------|

## The NMR spectra of substrates and epoxy methacrylated pre-polymers

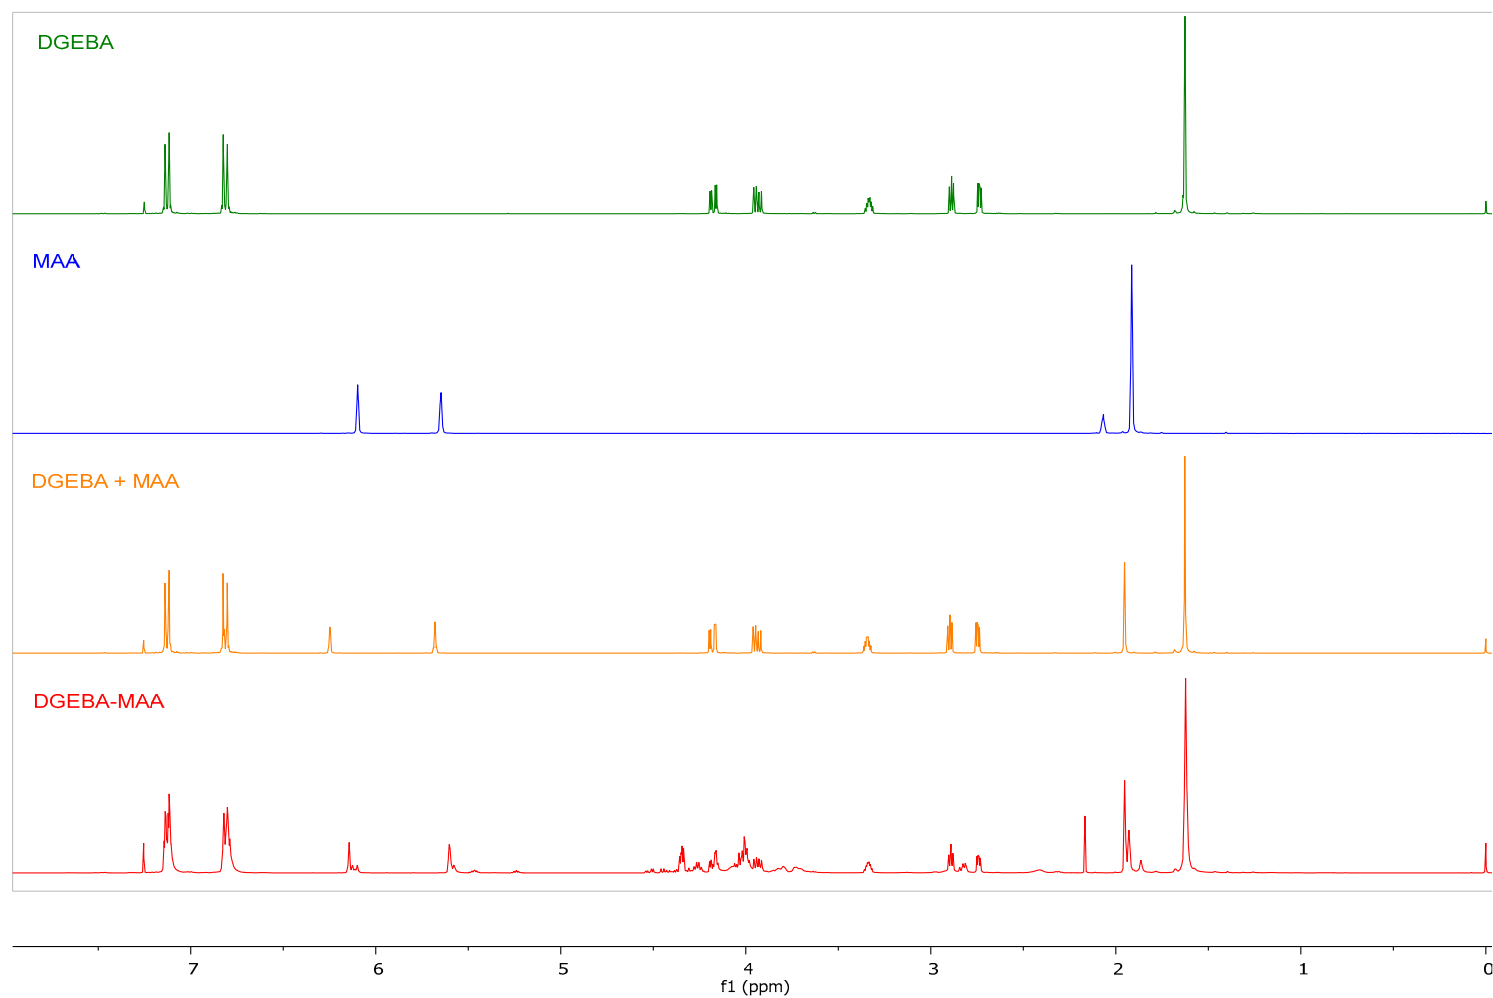

**Figure S1.**  $^1\text{H}$  NMR spectra of DGBA (green), MAA (blue), the mixture of DGBA and MAA (orange), and reaction mixture DGBA-MAA (red).

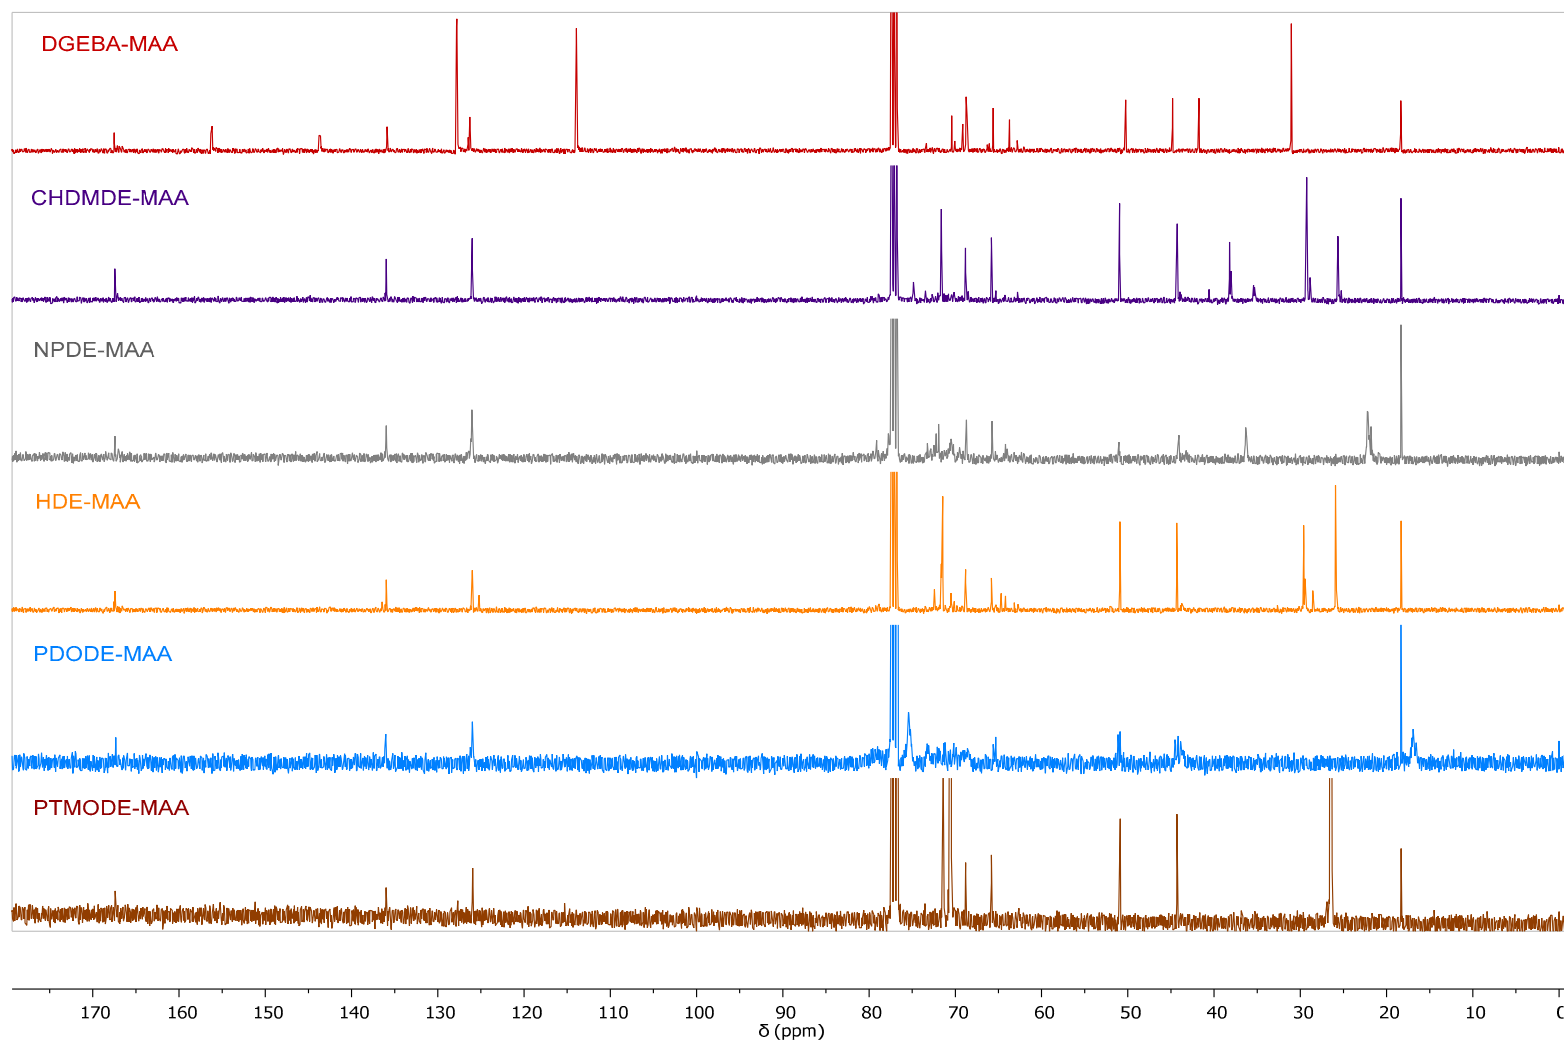

**Figure S2.**  $^{13}\text{C}$  NMR spectra of DGEBA-MAA (red), CHDMDE-MAA (violet), NPDE-MAA (grey), HDE-MAA (orange), PODE-MAA (blue), PTMODE-MAA (brown).

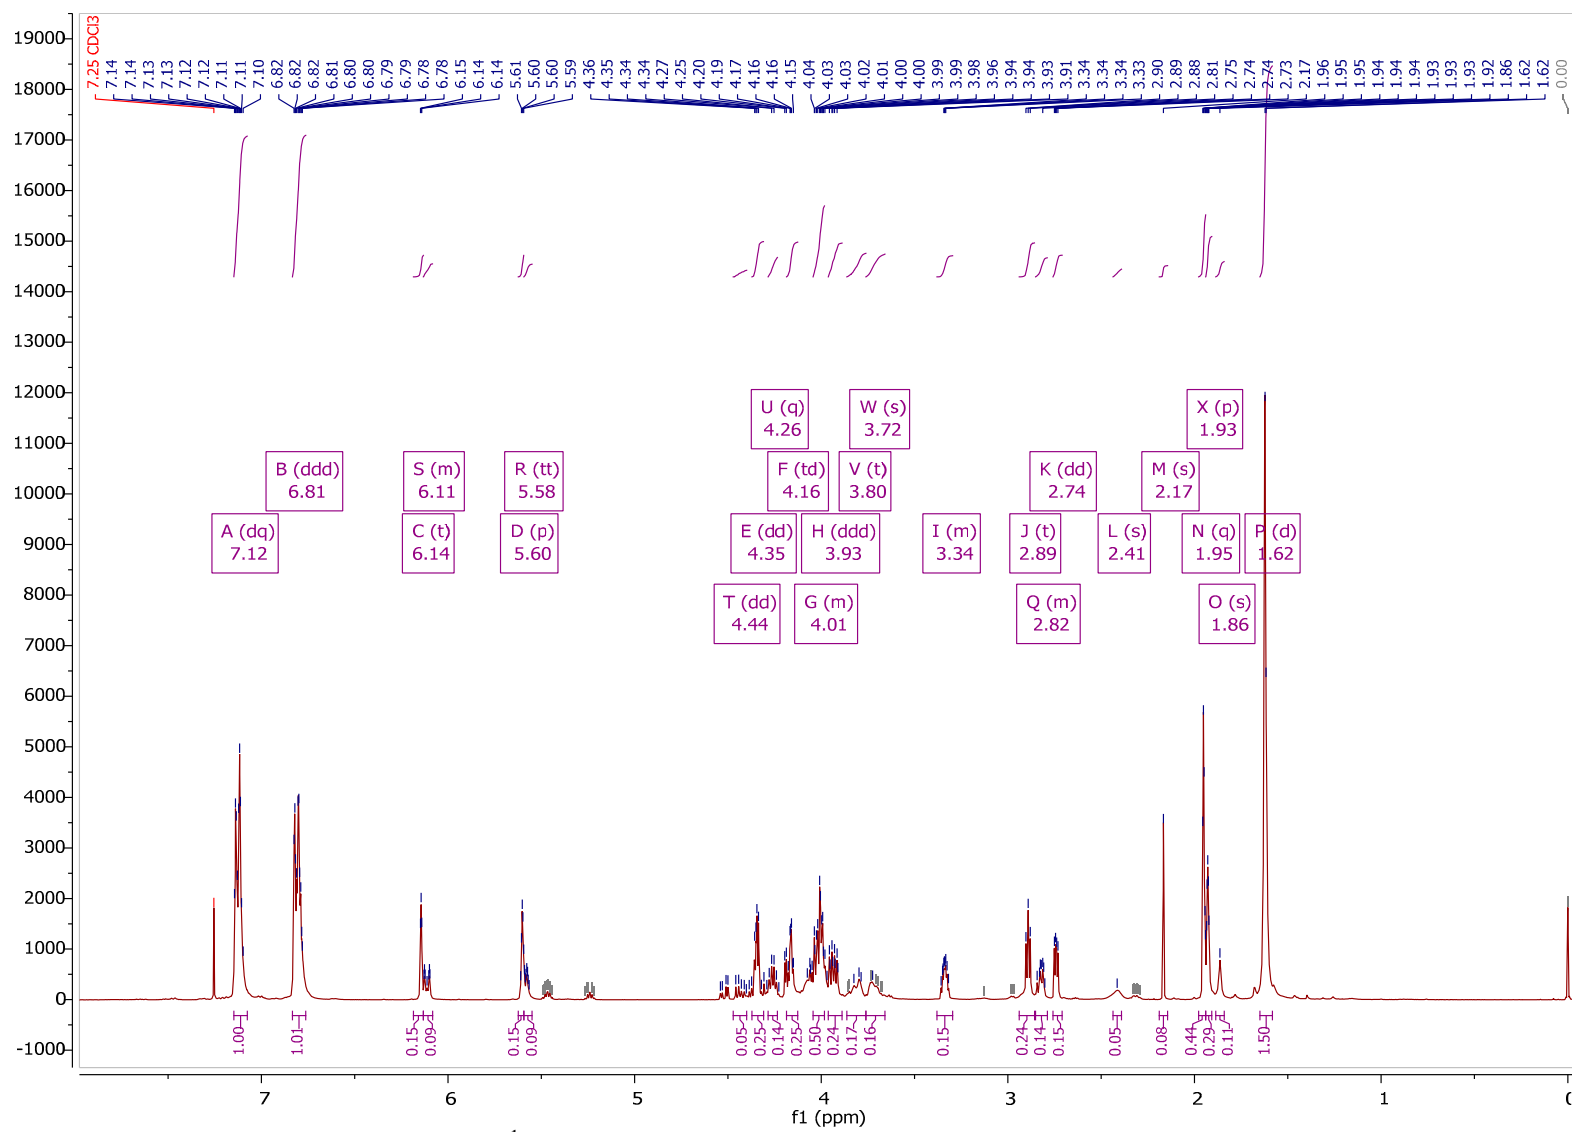

**Figure S3.**  $^1\text{H}$  NMR spectra of reaction mixture DGBA-MAA.

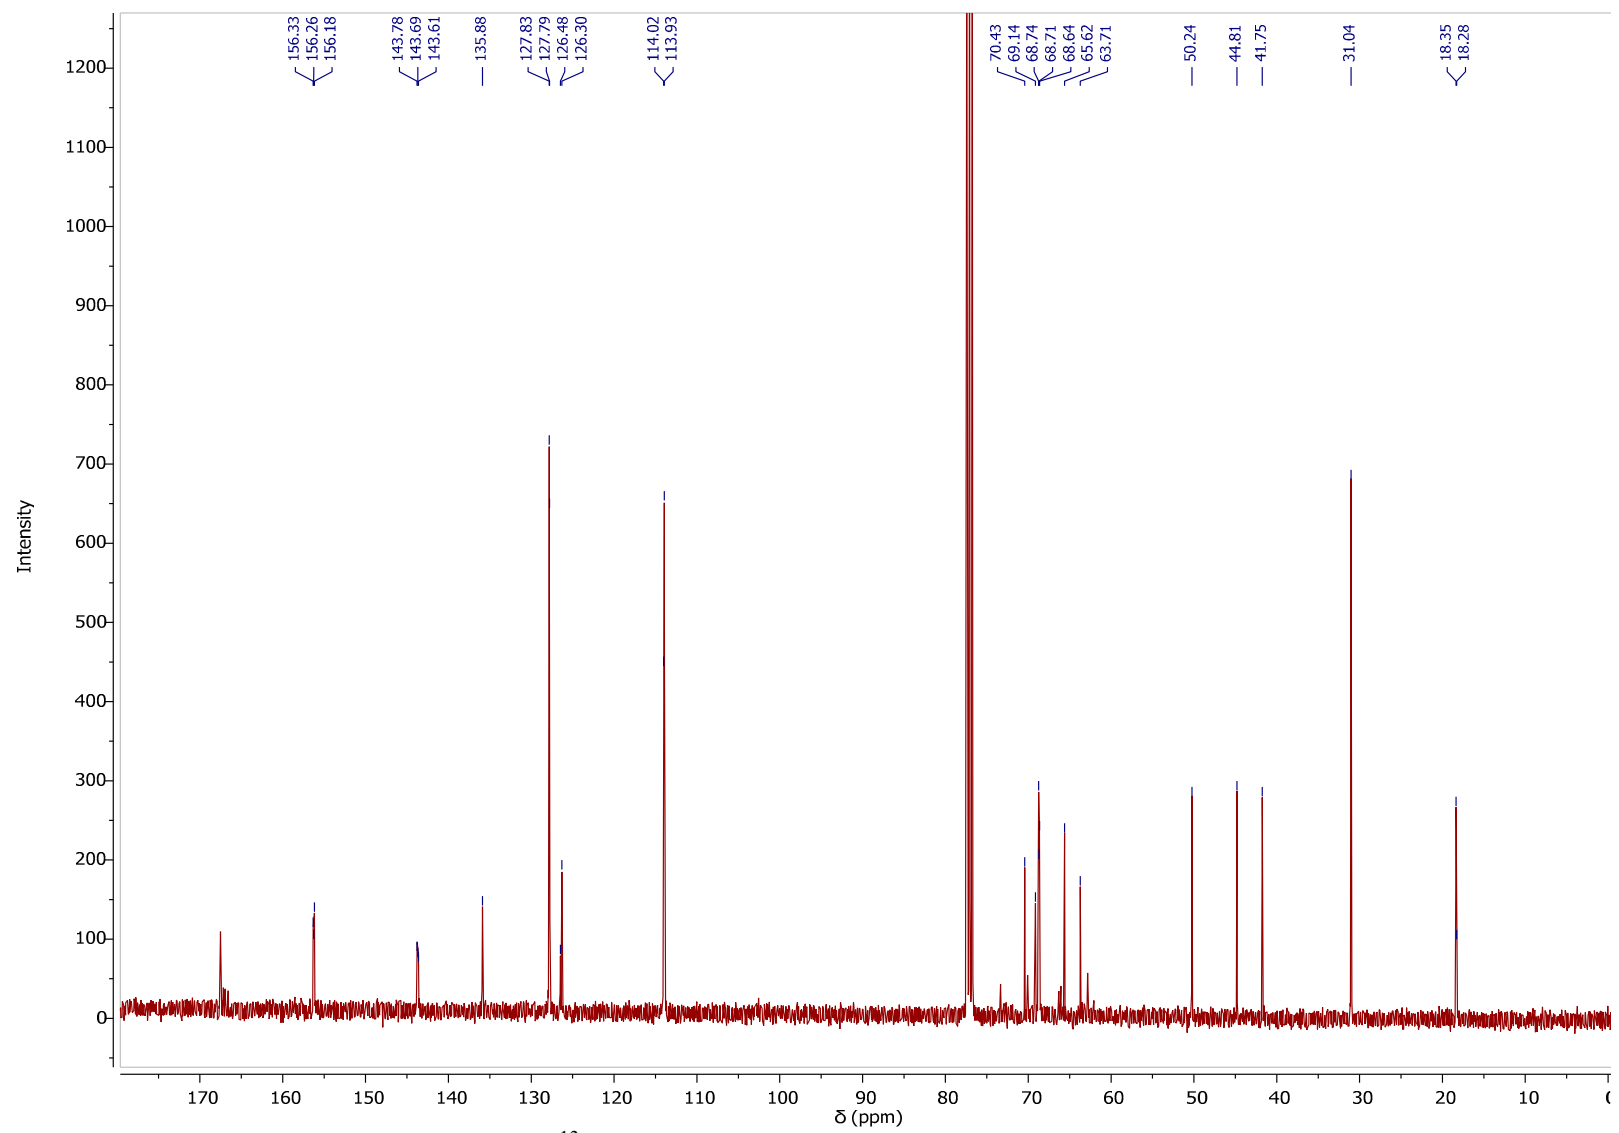

**Figure S4.** <sup>13</sup>C NMR spectra of reaction mixture DGBA-MAA.

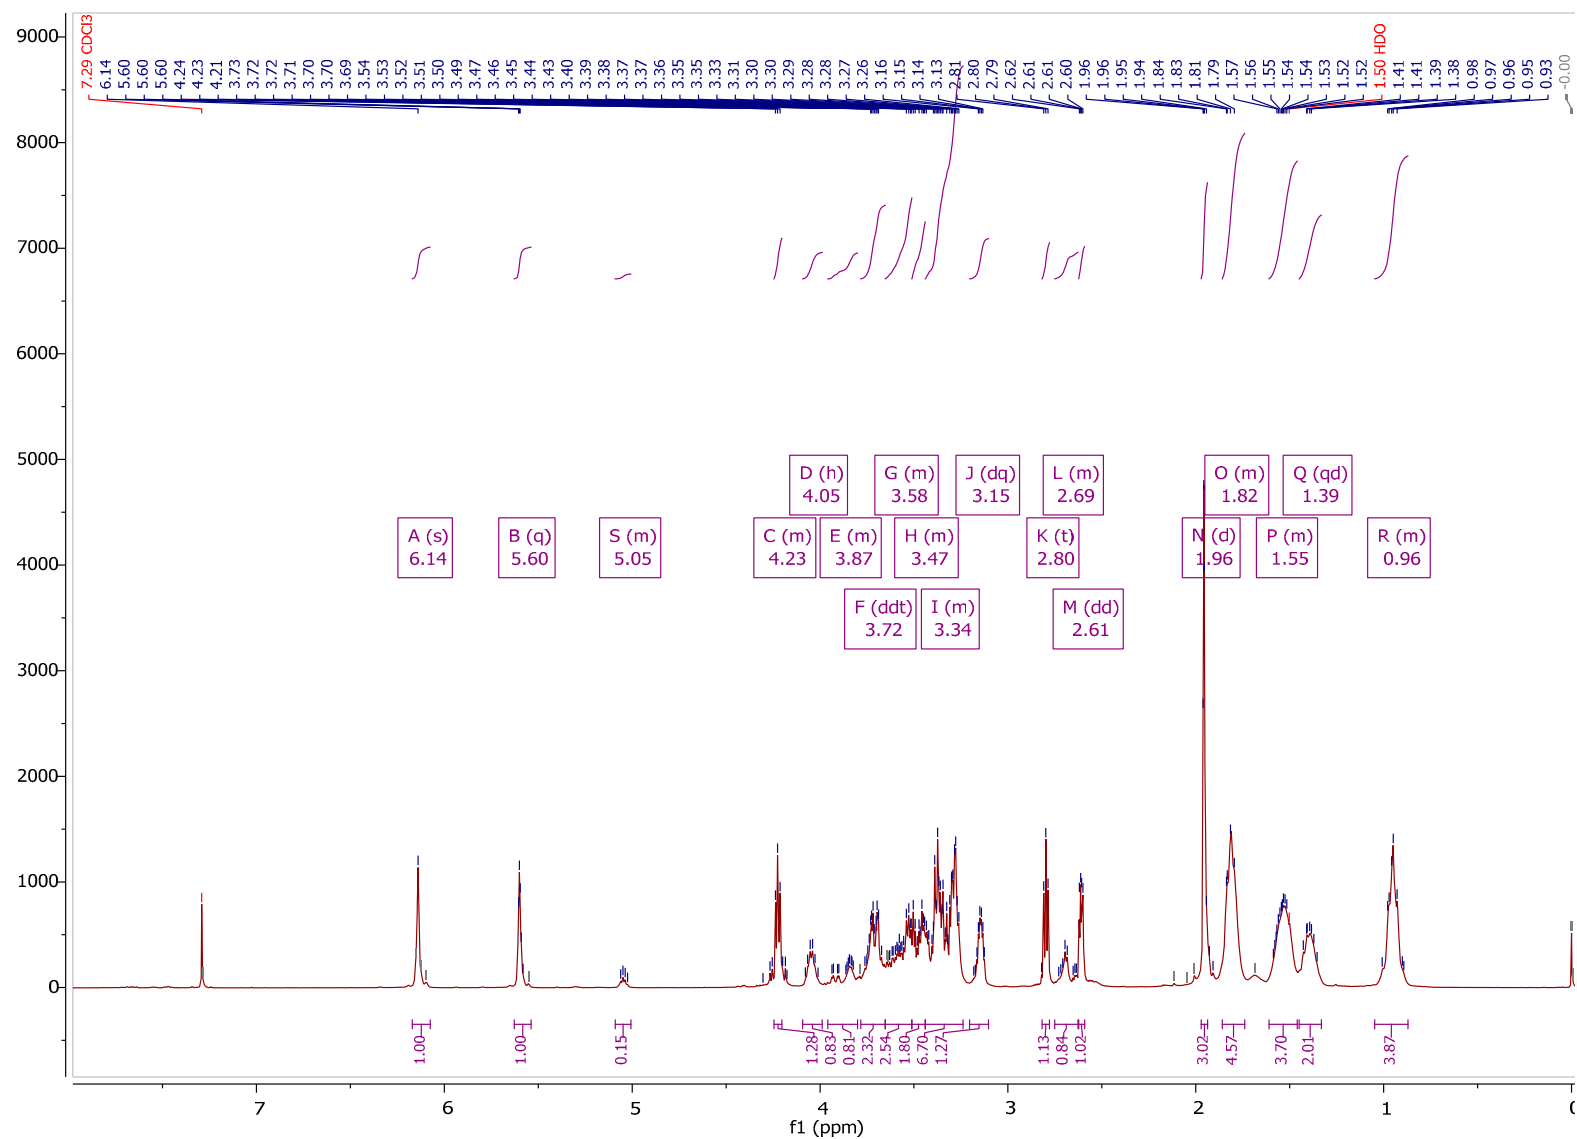

**Figure S5.**  $^1\text{H}$  NMR spectra of reaction mixture CHDMDE-MAA.

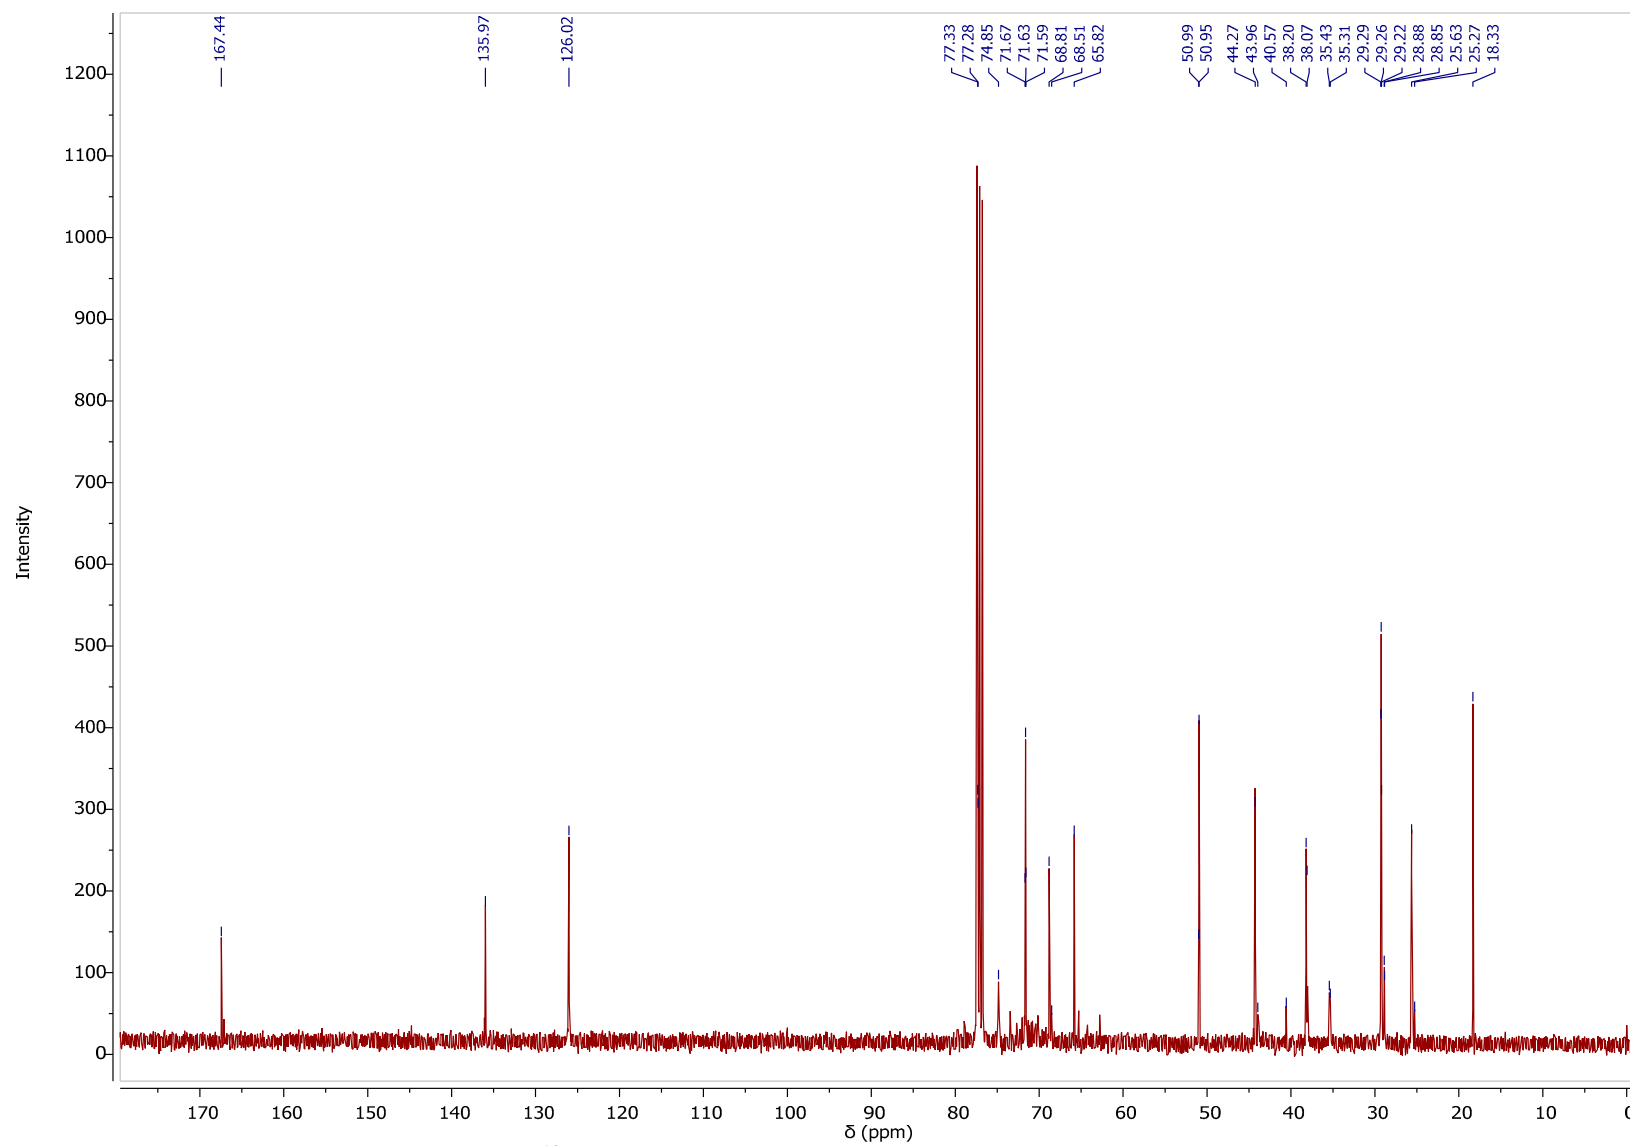

**Figure S6.**  $^{13}\text{C}$  NMR spectra of reaction mixture CHDMDE -MAA.

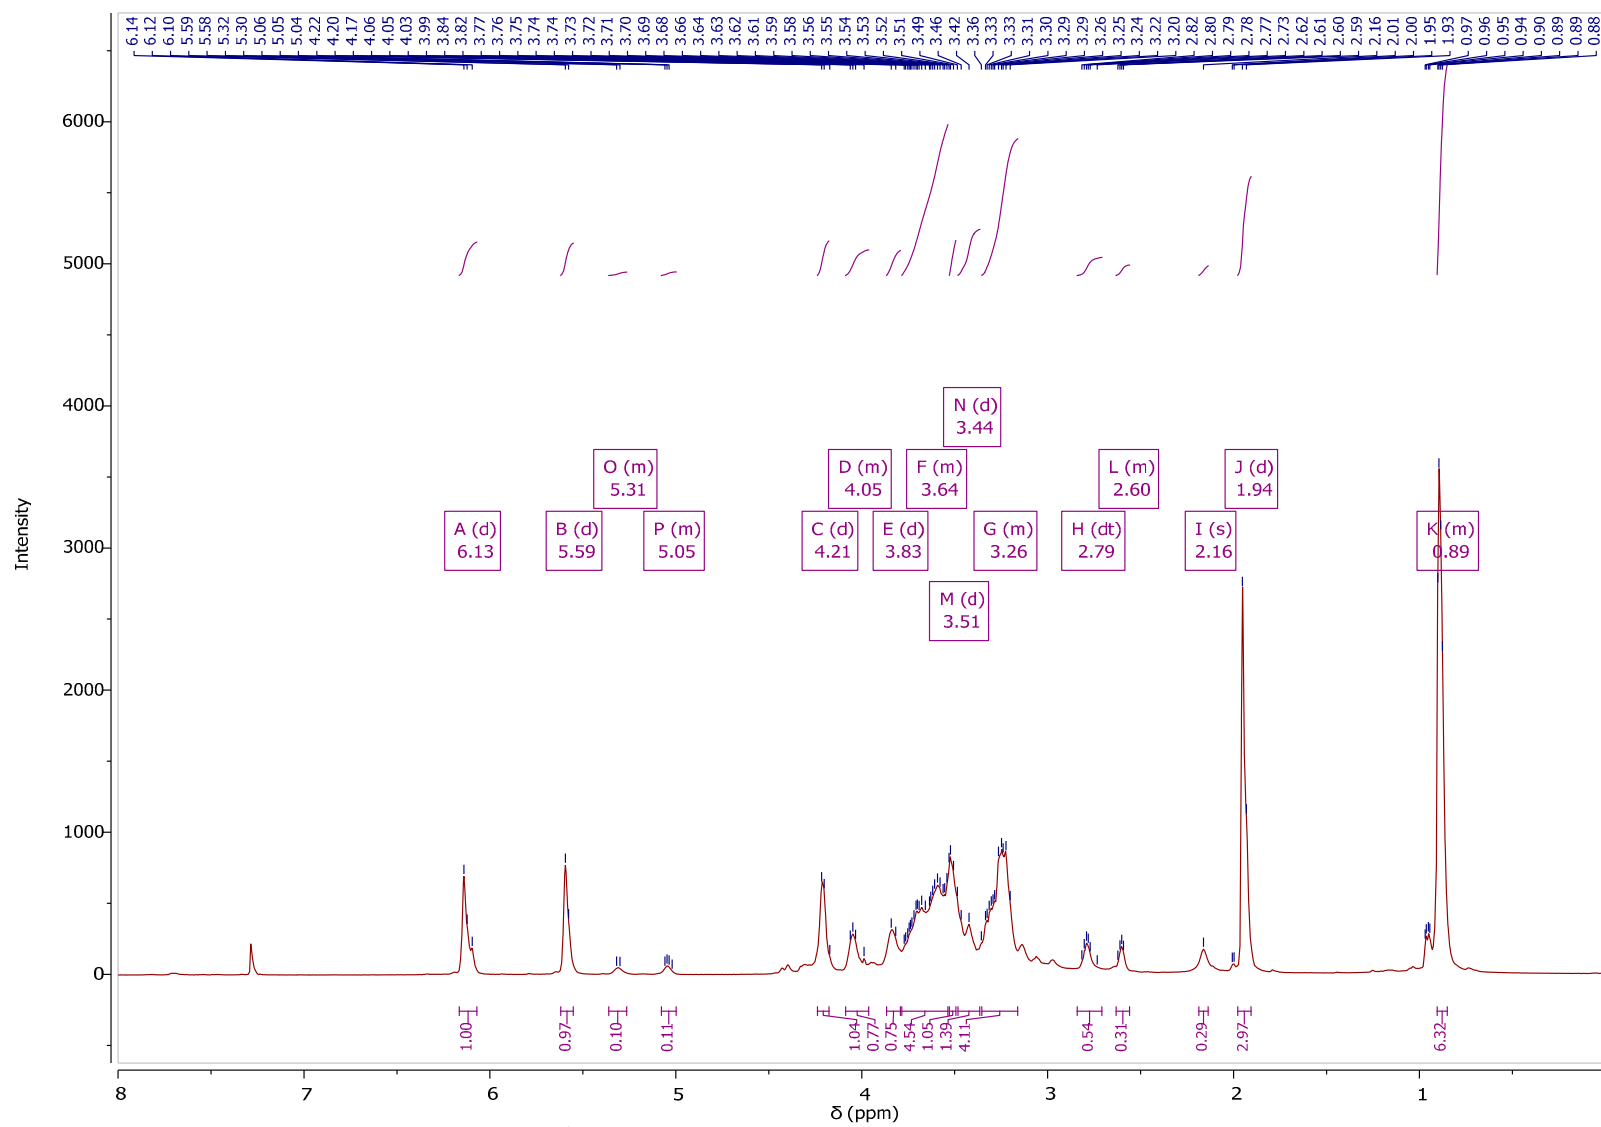

**Figure S7.**  $^1\text{H}$  NMR spectra of reaction mixture NPDE-MAA.



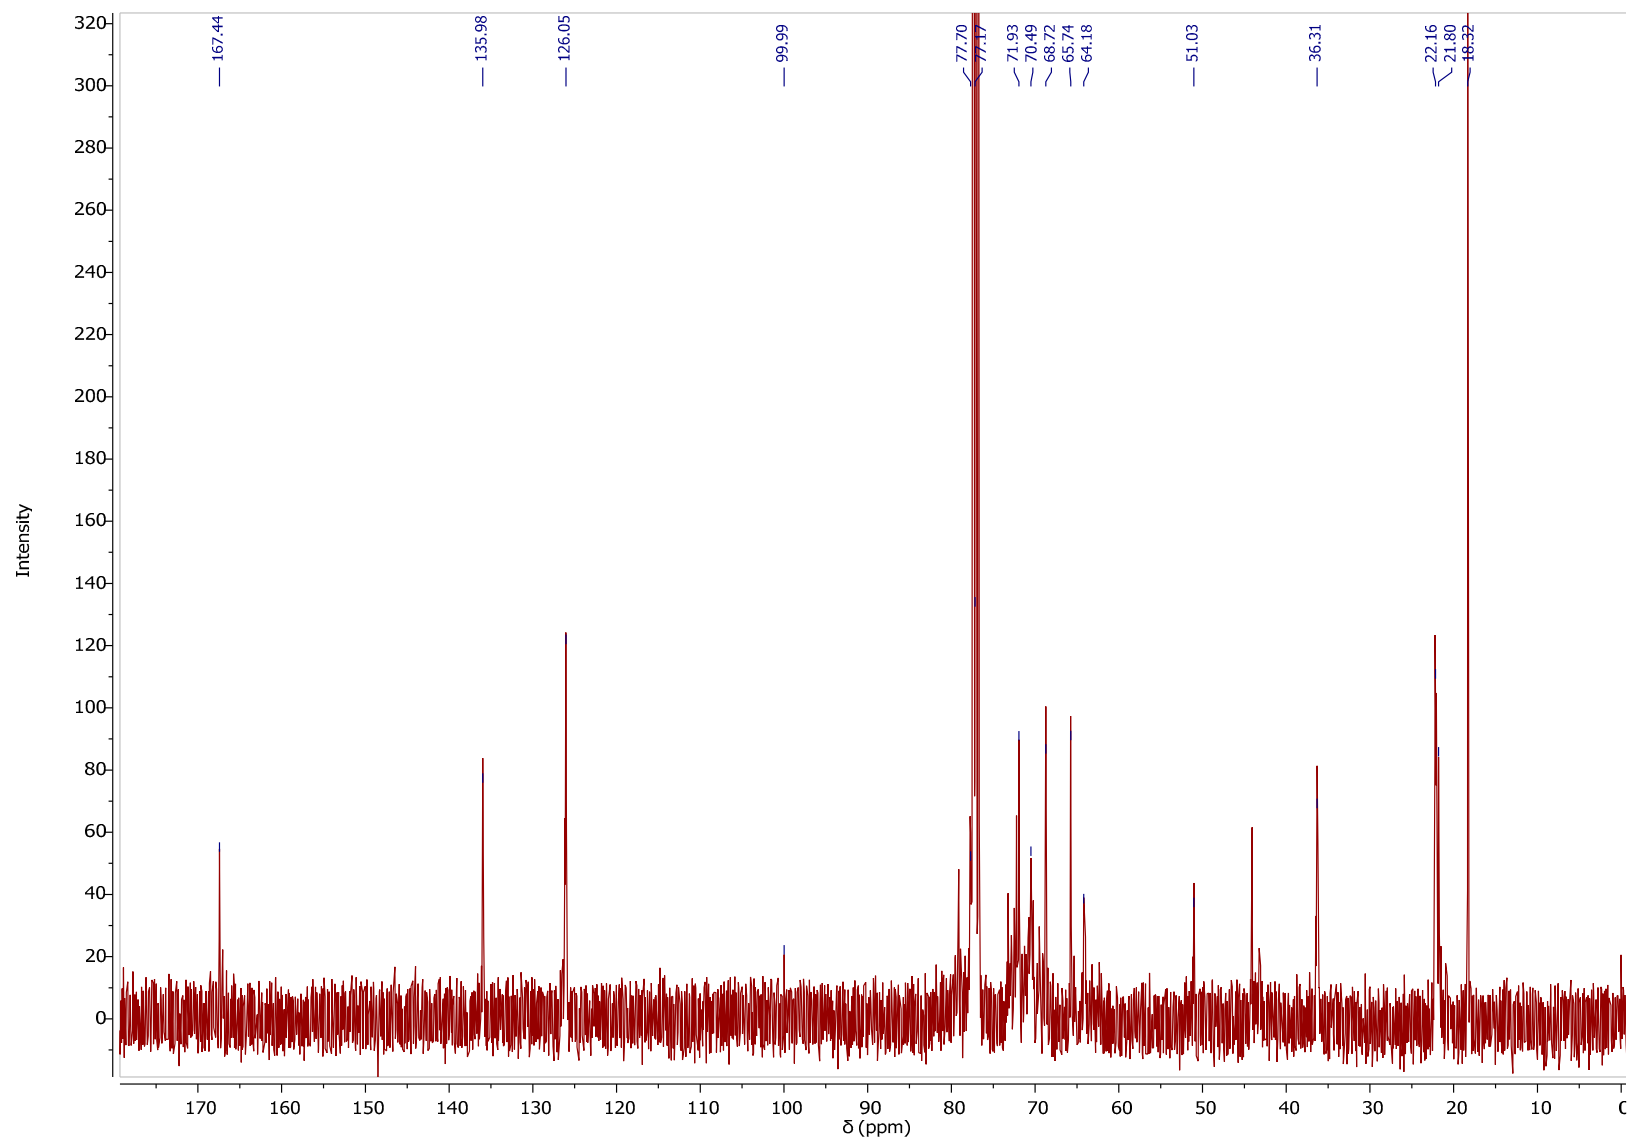

**Figure S8.** <sup>13</sup>C NMR spectra of reaction mixture NPDE -MAA.

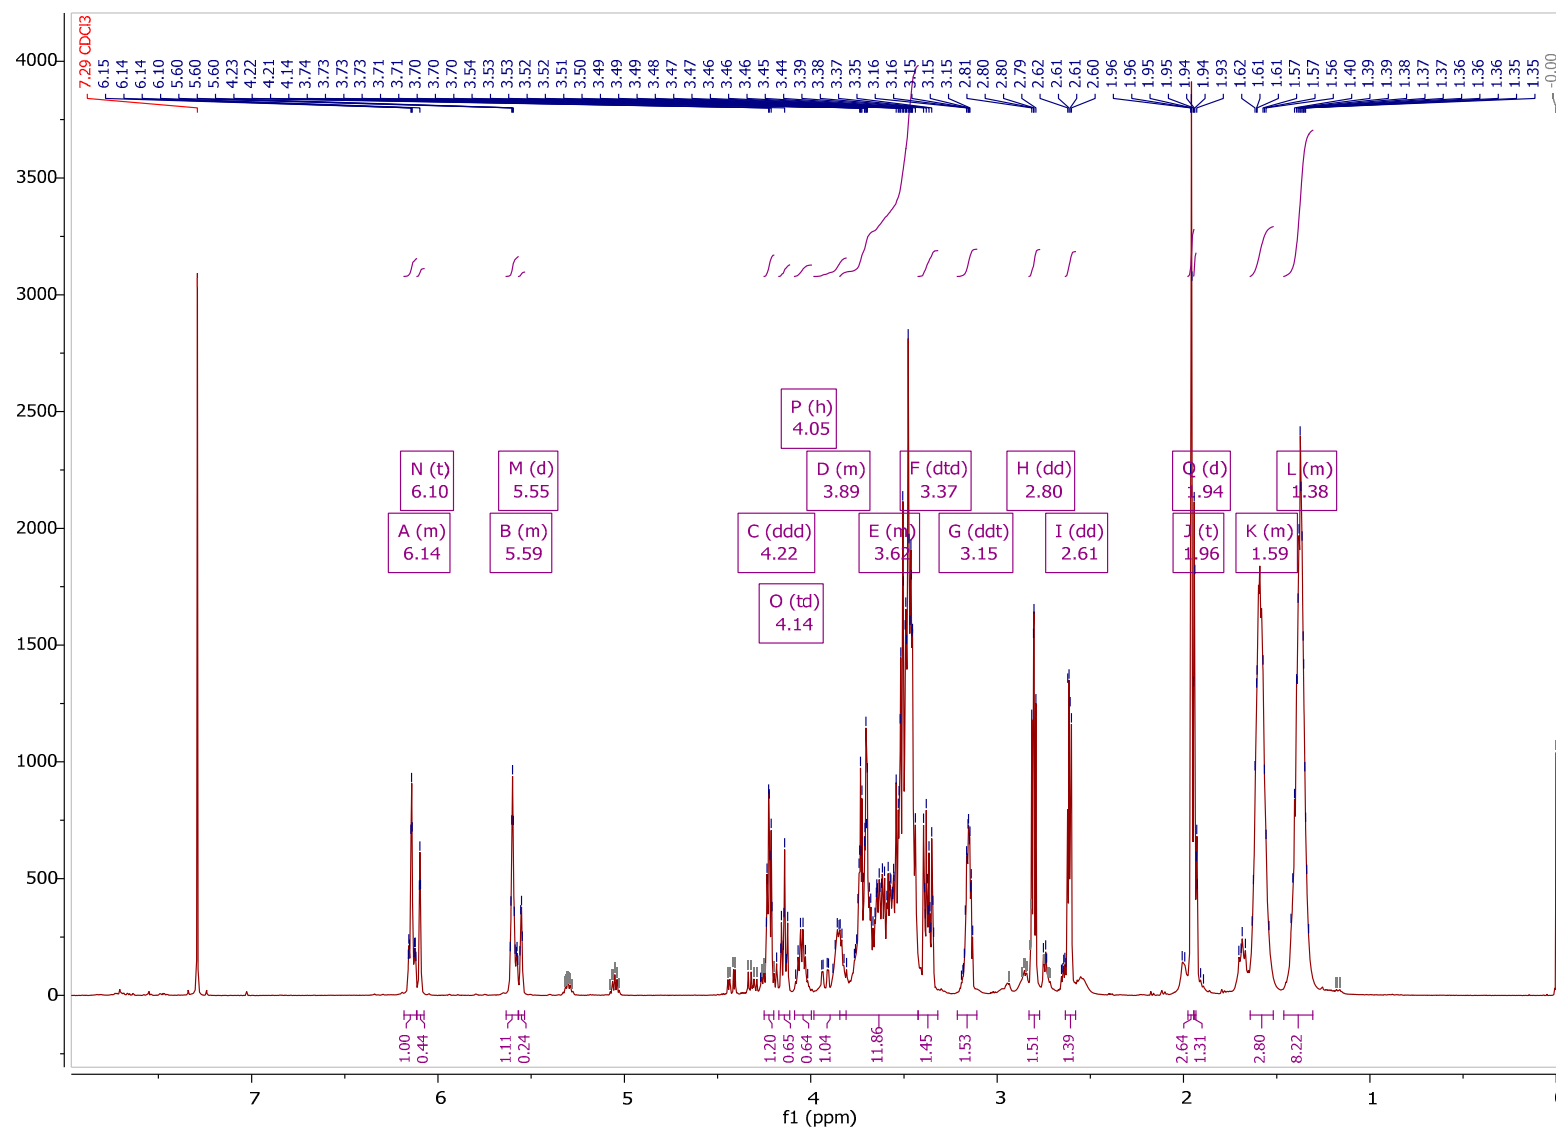

**Figure S9.**  $^1\text{H}$  NMR spectra of reaction mixture HDE-MAA.

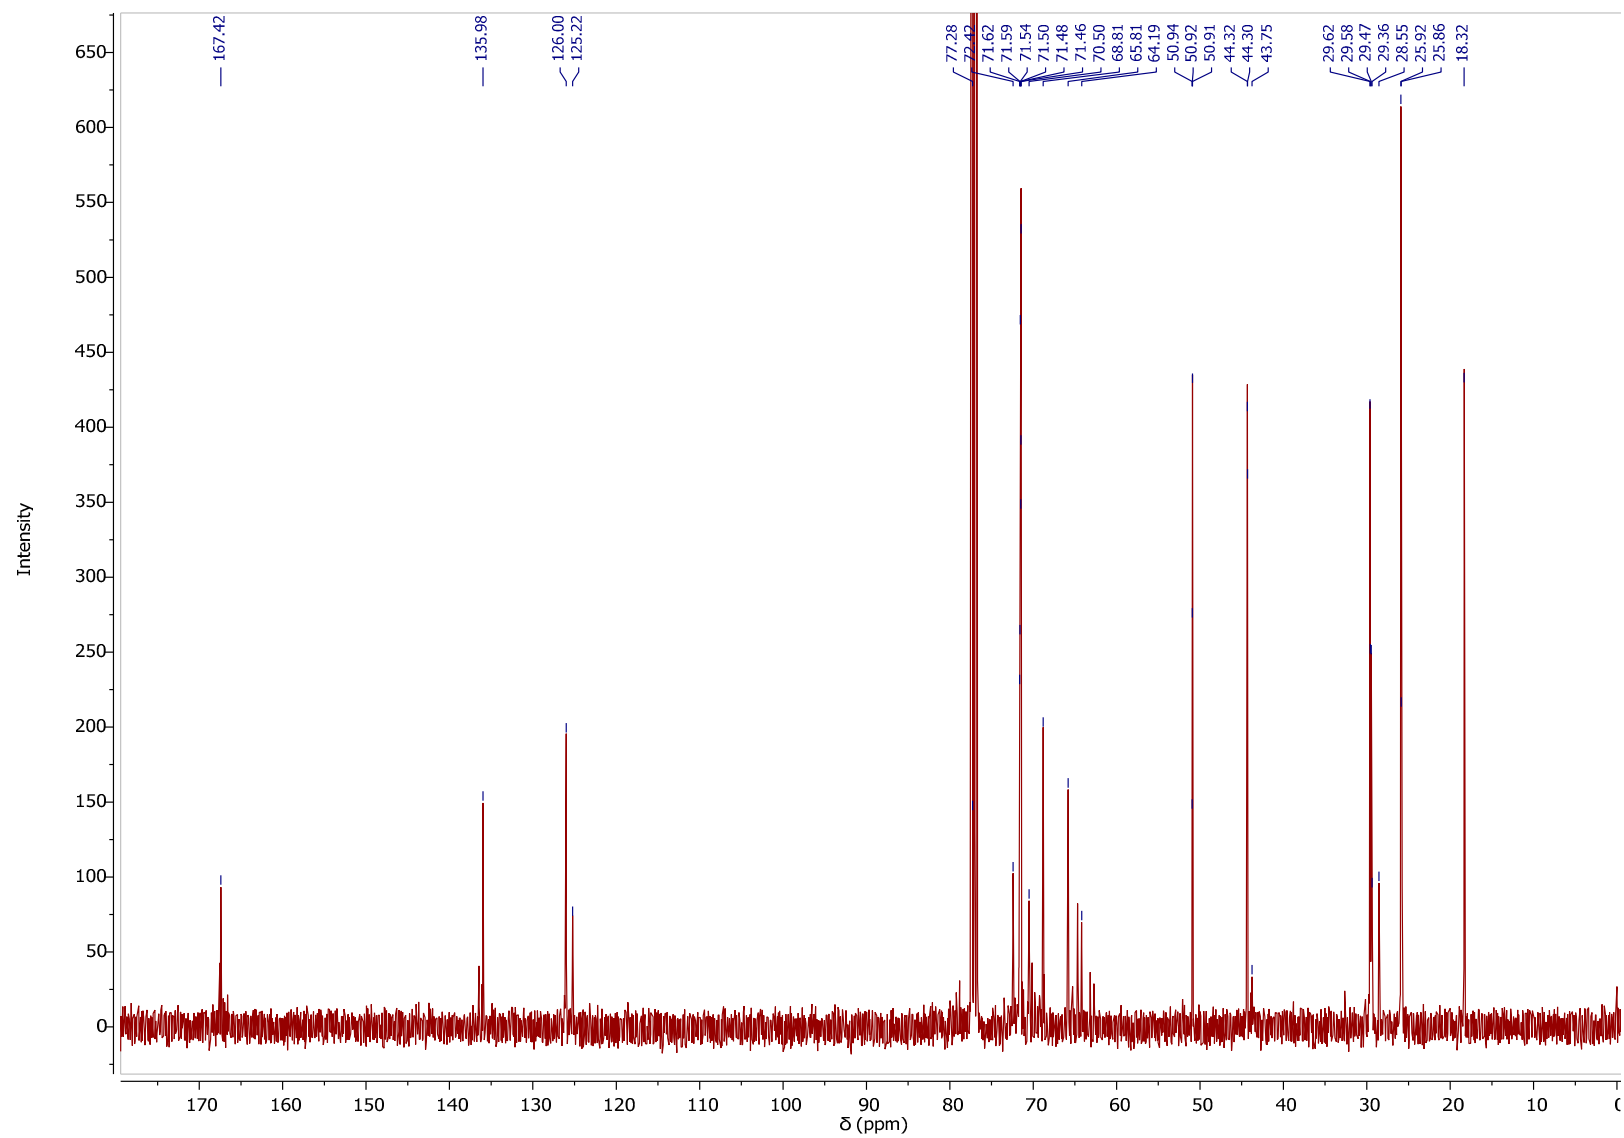

**Figure S10.**  $^{13}\text{C}$  NMR spectra of reaction mixture HDE -MAA.

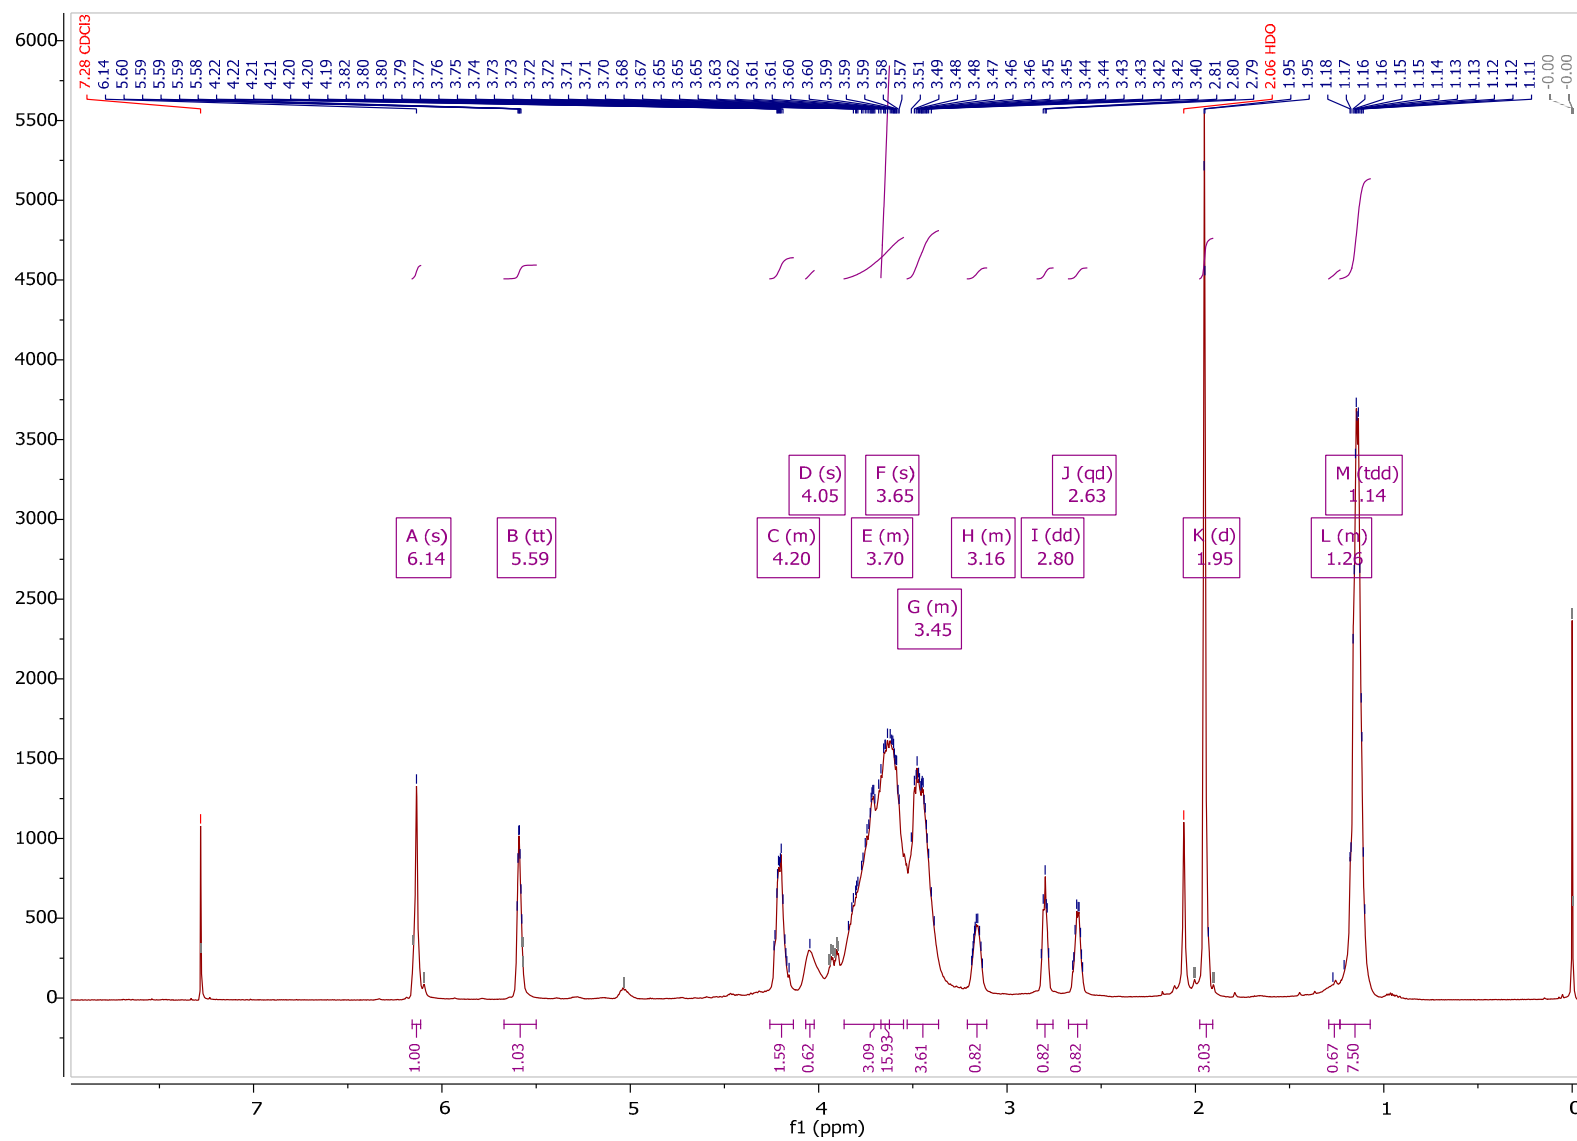

**Figure S11.** <sup>1</sup>H NMR spectra of reaction mixture PDODE-MAA.

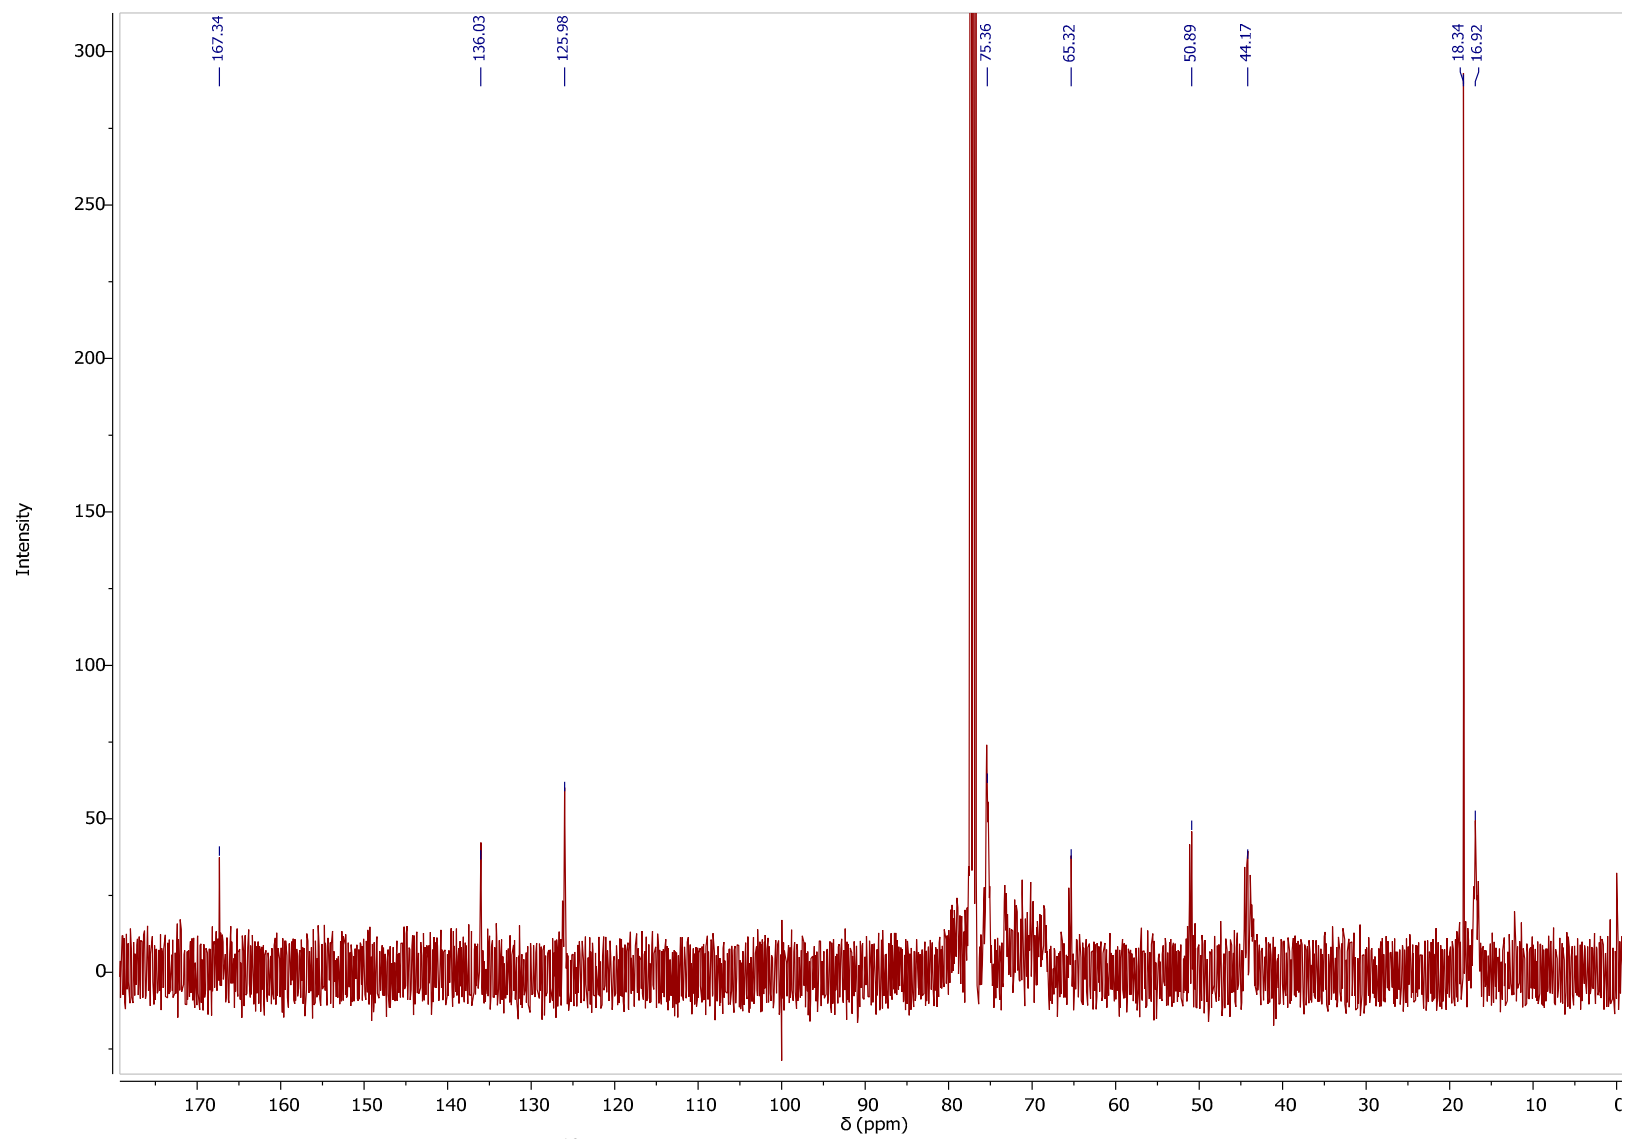

**Figure S12.** <sup>13</sup>C NMR spectra of reaction mixture PDODE -MAA.

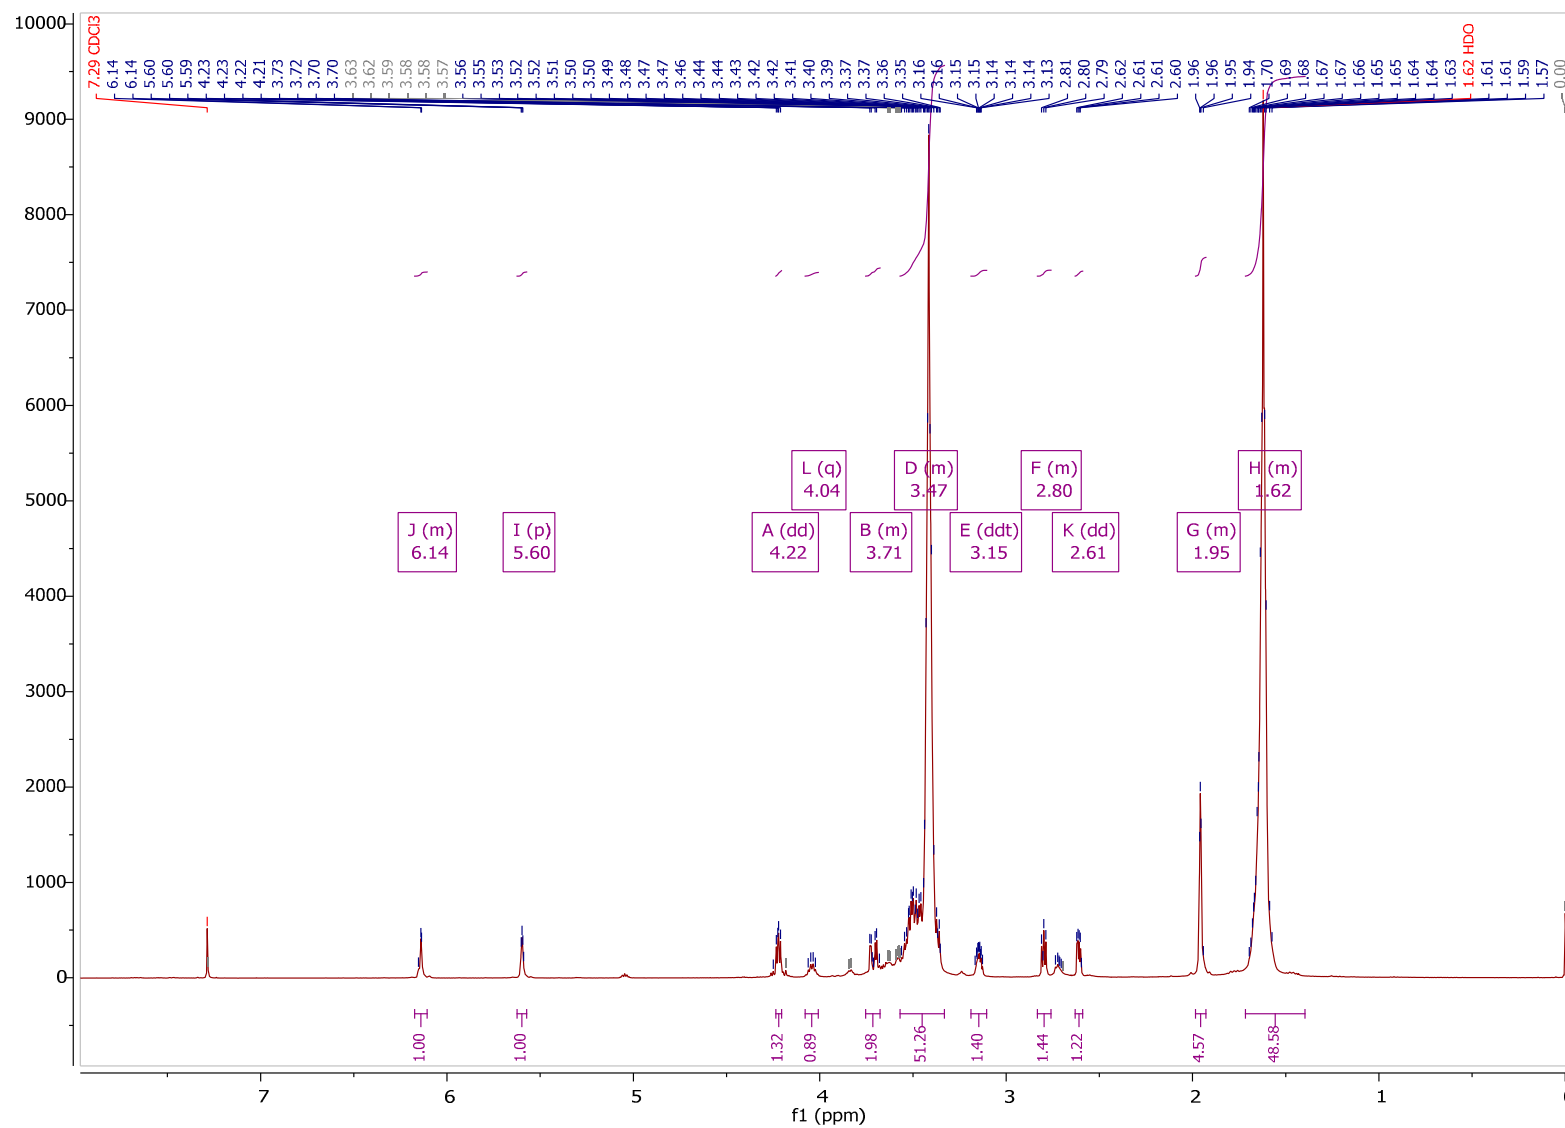

**Figure S13.**  $^1\text{H}$  NMR spectra of reaction mixture PTMODE-MAA.

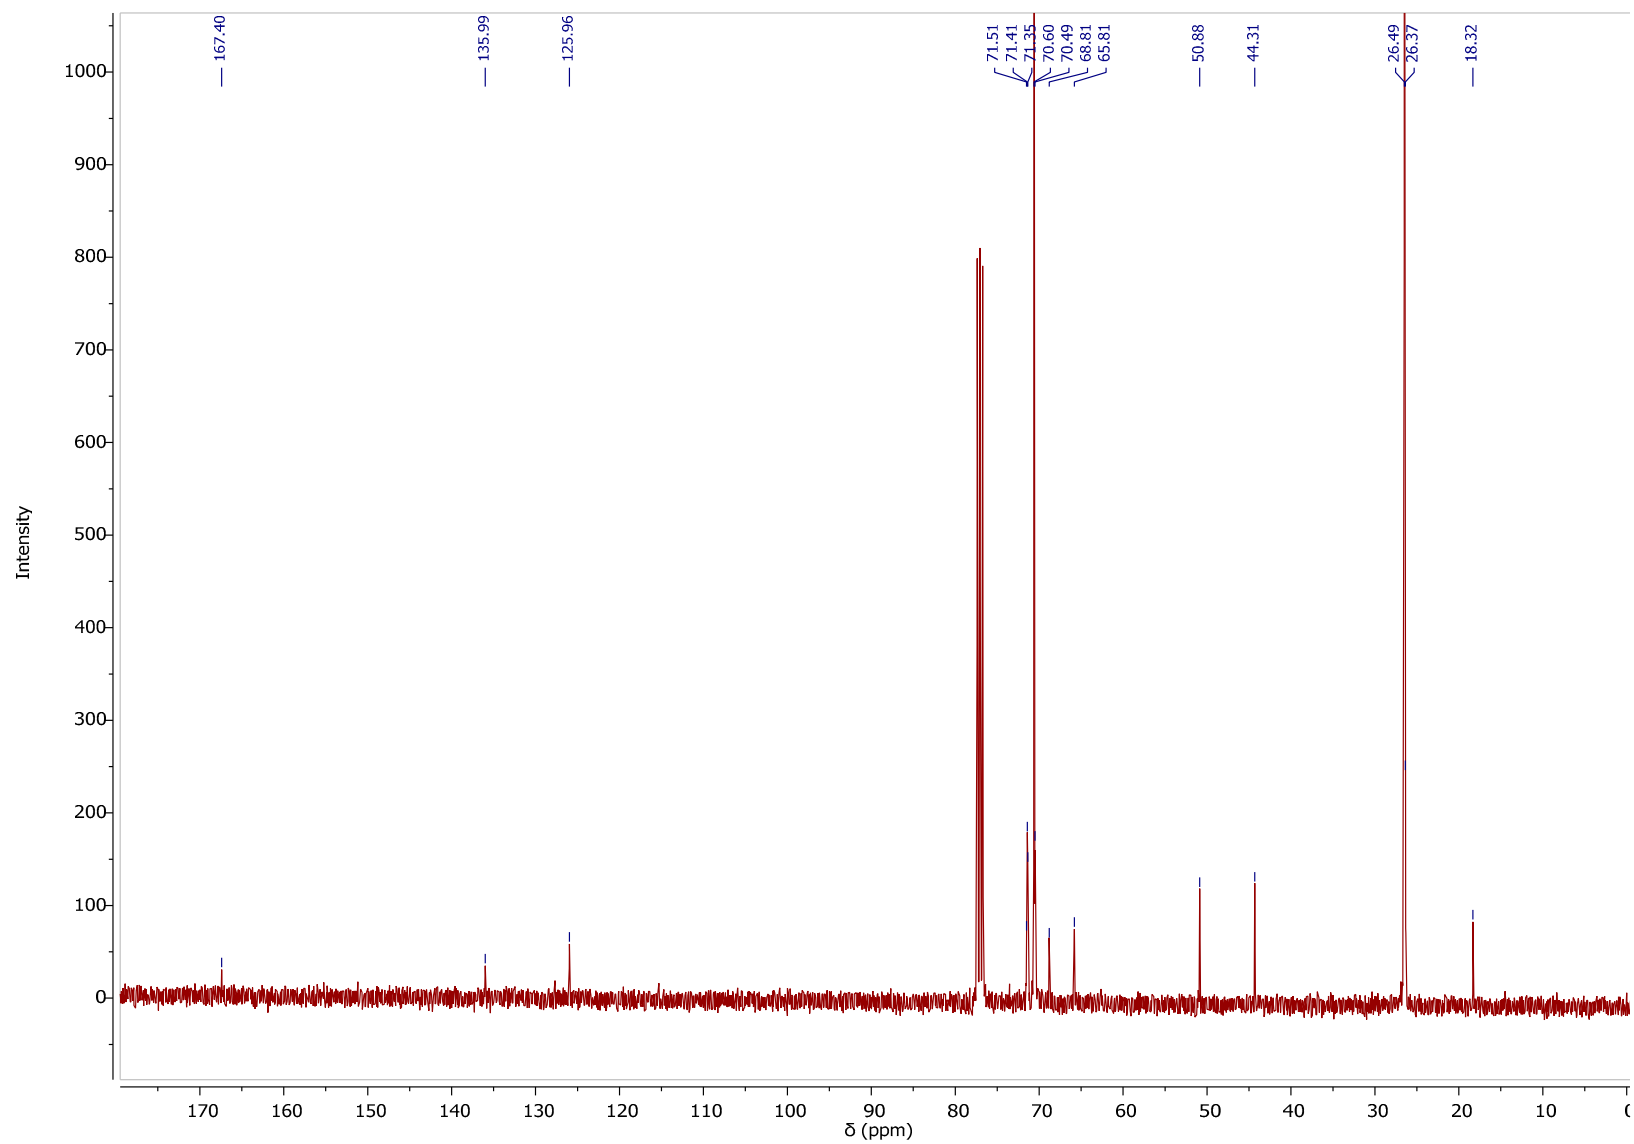

**Figure S14.** <sup>13</sup>C NMR spectra of reaction mixture PTMODE -MAA.
